# Supplementary material for: Oxidative Synthesis of Acid Blue 7 Dye Catalyzed by CuO/Silicotungstic Acid in Water-Phase
Source: MDPI journal article supplement (doi:10.3390/ma14164505), 2021-08-11
Supplement: s1 [file s1]

Supplementary Materials

# Oxidative Synthesis of Acid Blue 7 Dye Catalyzed by CuO/Silicotungstic Acid in Water-Phase

Akihiro Nomoto<sup>1,\*</sup>, Tomoya Okada<sup>1</sup>, Yuki Yamamoto<sup>1</sup>, Shota Kuroda<sup>1</sup>, Kuniaki Marui<sup>1</sup>, Mika Yamamoto<sup>1</sup>, Hidetaka Tsujimoto<sup>2</sup>, Michio Ueshima<sup>1</sup>, Tamotsu Nishigahana<sup>3</sup>, Keiji Itoh<sup>3</sup>, Gohei Kobata<sup>3</sup>, Shintaro Kodama<sup>1</sup> and Akiya Ogawa<sup>1</sup>

<sup>1</sup> Department of Applied Chemistry, Graduate School of Engineering, Osaka Prefecture University, 1-1 Gakuen-cho, Nakaku, Sakai, Osaka 599-8531, Japan; 40ogntks@gmail.com (T.O.); syb02137@edu.osakafu-u.ac.jp (Y.Y.); sab02061@edu.osakafu-u.ac.jp (S.K.); kuniaki.marui@honshuchemical.co.jp (K.M.); yamamotomiike620@gmail.com (M.Y.); ueshima.m@zeus.eonet.ne.jp (M.U.); skodama@chem.osakafu-u.ac.jp (S.K.); ogawa@chem.osakafu-u.ac.jp (A.O.)

<sup>2</sup> Environmental and Materials Chemistry, Department of Technological Systems, Osaka Prefecture University College of Technology, 26-12 Saiwai-cho, Neyagawa-shi, Osaka 572-8572, Japan; h-tsujimoto@osaka-pct.ac.jp

<sup>3</sup> Kobata Sangyo Co., Ltd., 1-6-22 Kyomachibori, Nishi-ku, Osaka 550-0003, Japan; ta-nishigahana@kbts.jp (T.N.); kei\_ito2911@zeus.eonet.ne.jp (K.I.); go-kobata@kbts.jp (G.K.)

\* Correspondence: nomoto@chem.osakafu-u.ac.jp; Tel.: +81-72-254-9295

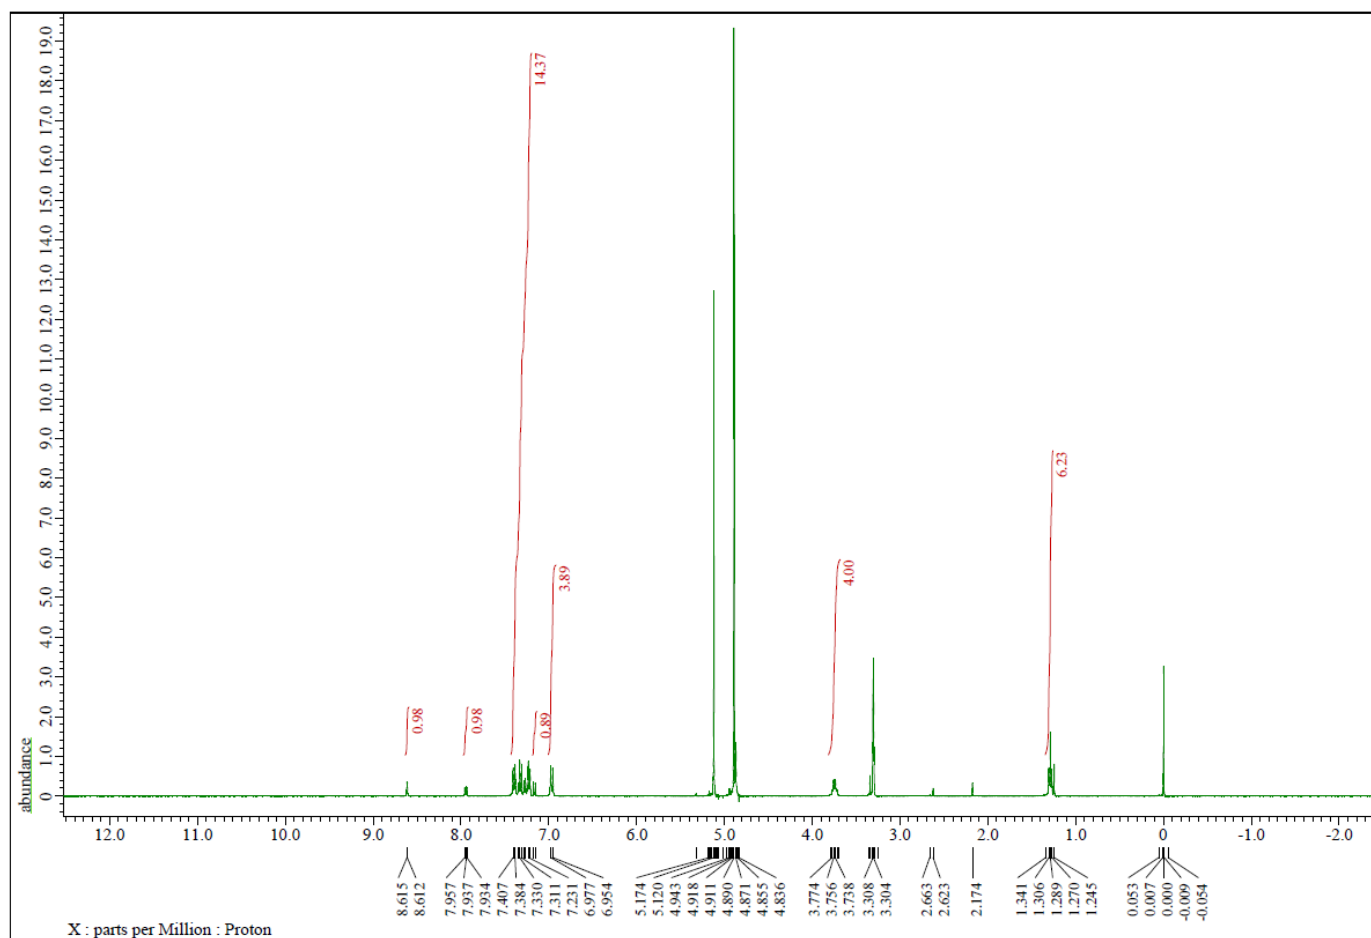

**Figure S1.** <sup>1</sup>H-NMR of purchased and purified Acid Blue 7 (Alphazurine A).

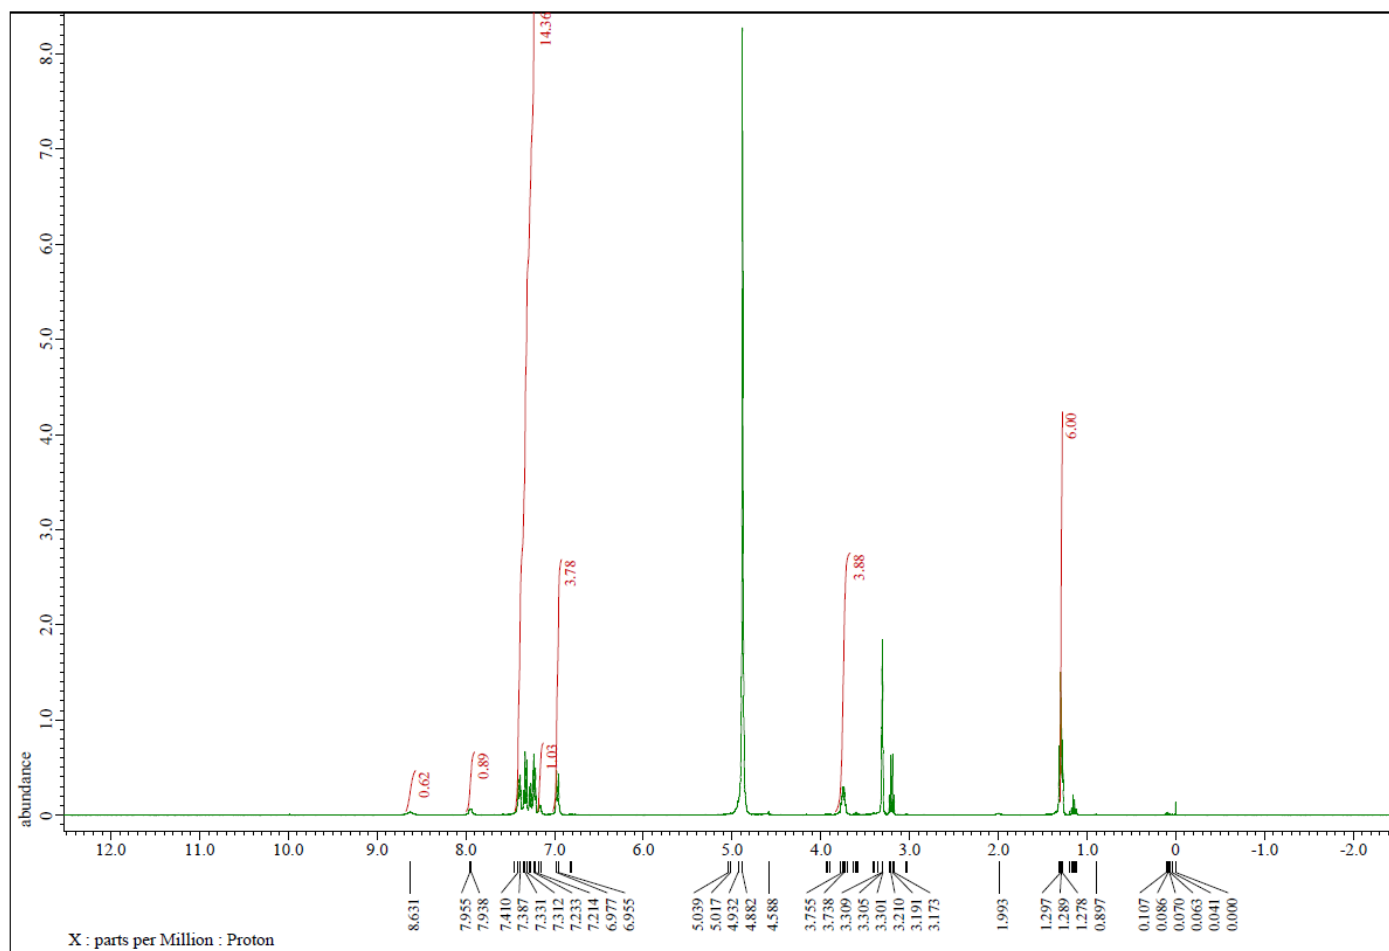

**Figure S2.**  $^1\text{H}$ -NMR of synthesized Acid Blue 7.

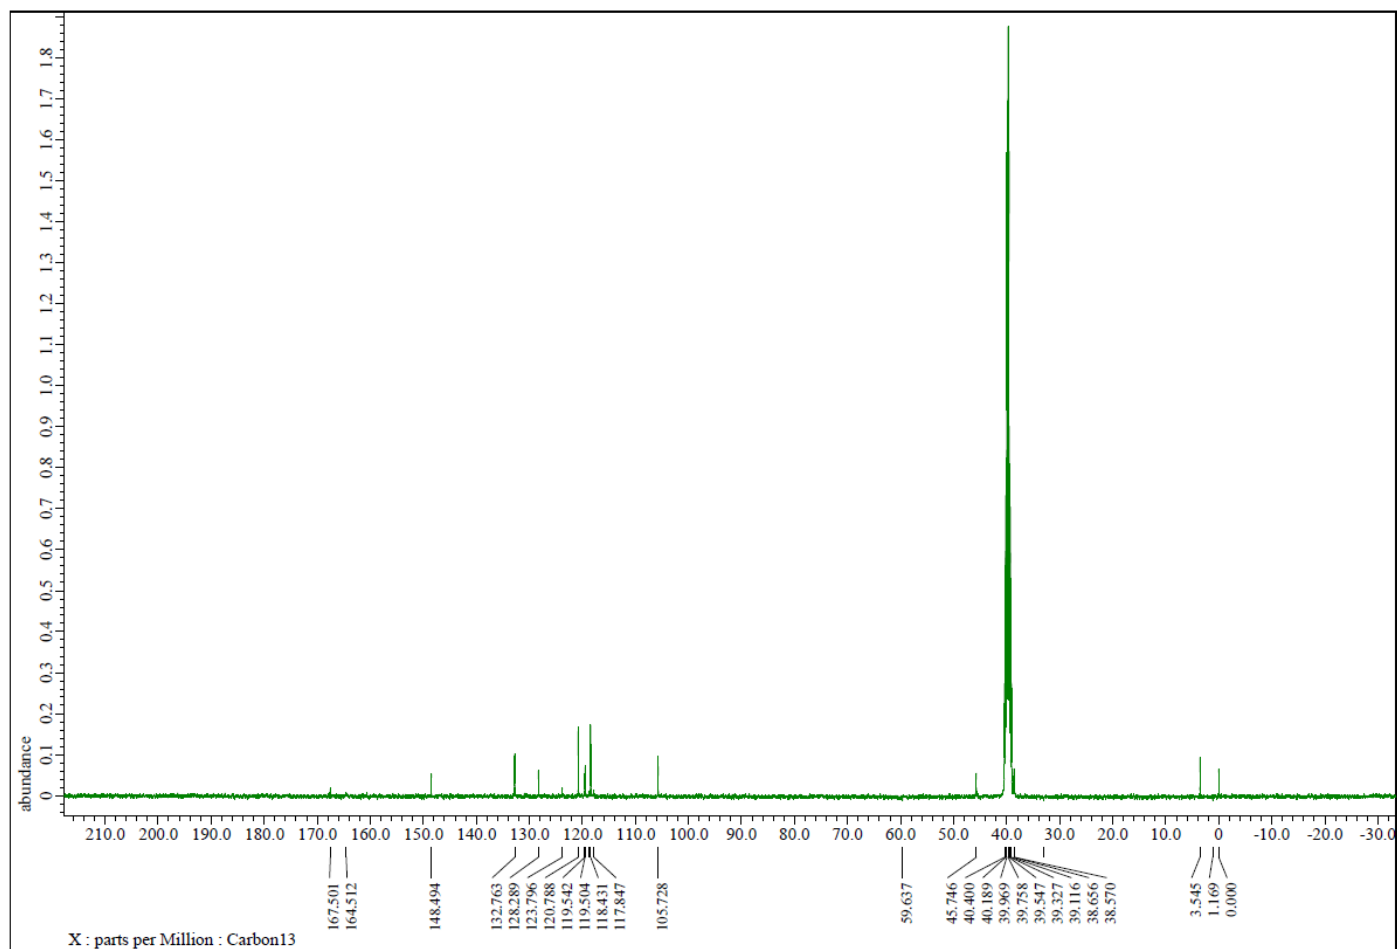

**Figure S3.**  $^{13}\text{C}$ -NMR of synthesized Acid Blue 7.

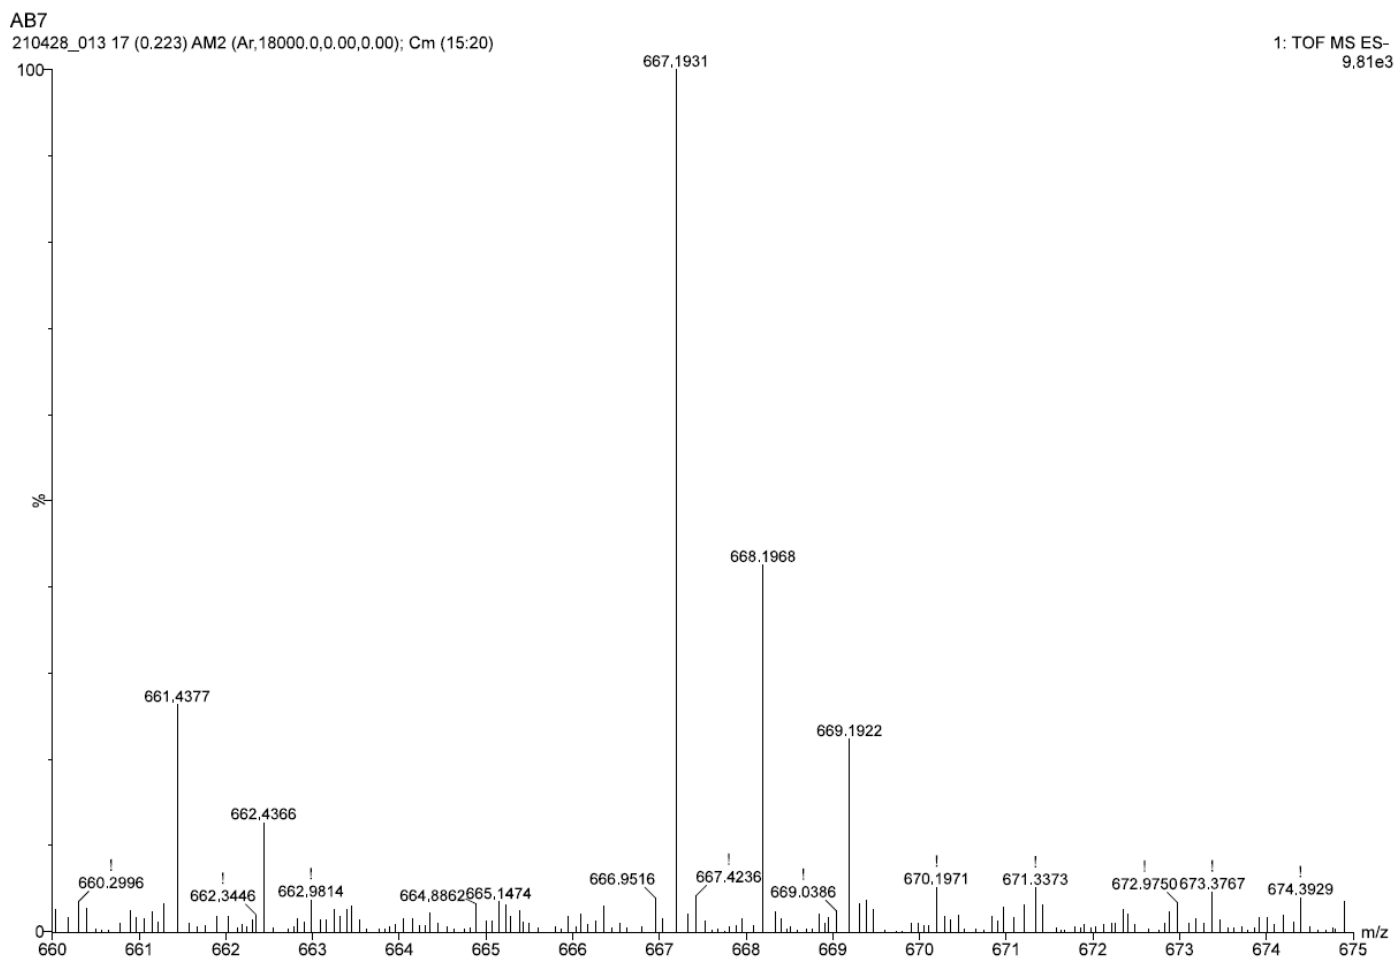

Figure S4. Mass spectra of synthesized Acid Blue 7.

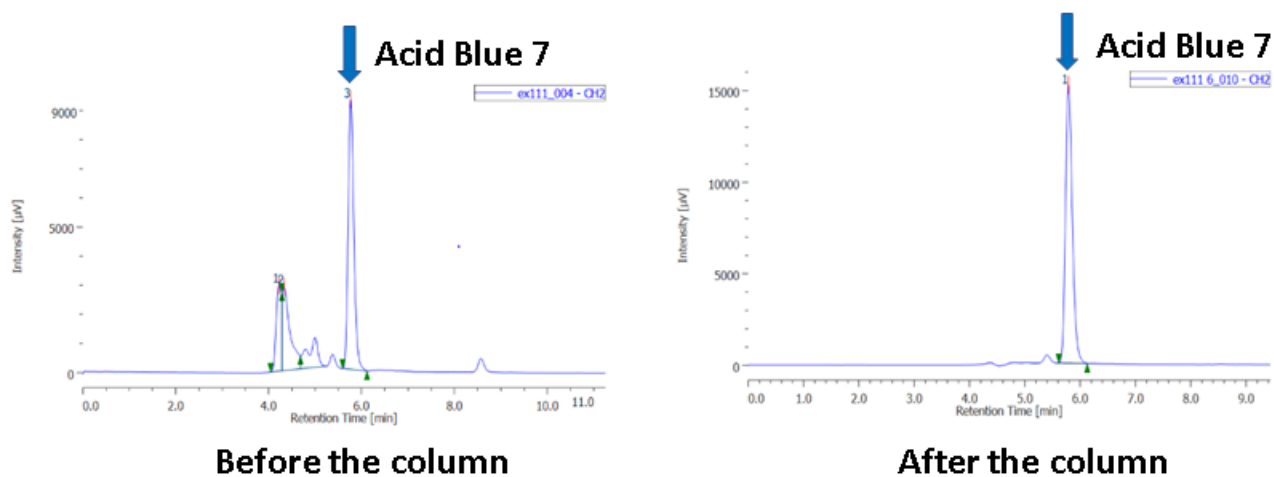

Figure S5. HPLC results of 10 gram-scale synthesis; before purification (left) and after purification (right) by column chromatography.
